# Supplementary material for: Portable eye-tracking as a reliable assessment of oculomotor, cognitive and reaction time function: Normative data for 18–45 year old
Source: PubMed Central journal article supplement (PMC8608311; doi:10.1371/journal.pone.0260351), 2021-11-22
Supplement: pone.0260351.s002.pdf [file pone.0260351.s002.pdf]

**S2 Table. Percentiles for saccades and smooth pursuit tests.** Data present the 2.5, 5, 10, 25, 75, 90, 95 and 97.5 percentile for each metric.

| Test: Saccade – Random, Horizontal |      |             |              |                    |                           |
|------------------------------------|------|-------------|--------------|--------------------|---------------------------|
|                                    |      | Latency (s) | Accuracy (%) | Final accuracy (%) | AUF (deg <sup>2</sup> /s) |
| Percentiles                        | 2.5  | 0.14        | 81           | 88                 | 8205                      |
|                                    | 5    | 0.14        | 83           | 90                 | 8591                      |
|                                    | 10   | 0.15        | 85           | 92                 | 9141                      |
|                                    | 25   | 0.16        | 89           | 94                 | 9810                      |
|                                    | 75   | 0.19        | 96           | 98                 | 11054                     |
|                                    | 90   | 0.20        | 98           | 100                | 11633                     |
|                                    | 95   | 0.21        | 100          | 102                | 12015                     |
|                                    | 97.5 | 0.22        | 103          | 104                | 12247                     |
| Test: Saccade – Random, Vertical   |      |             |              |                    |                           |
|                                    |      | Latency (s) | Accuracy (%) | Final accuracy (%) | AUF (deg <sup>2</sup> /s) |
| Percentiles                        | 2.5  | 0.14        | 75           | 79                 | 7630                      |
|                                    | 5    | 0.15        | 77           | 81                 | 7903                      |
|                                    | 10   | 0.16        | 80           | 85                 | 8253                      |
|                                    | 25   | 0.17        | 87           | 90                 | 9054                      |
|                                    | 75   | 0.20        | 99           | 100                | 10791                     |
|                                    | 90   | 0.21        | 104          | 103                | 11434                     |
|                                    | 95   | 0.22        | 107          | 105                | 11818                     |
|                                    | 97.5 | 0.23        | 110          | 107                | 12025                     |

| Test: Smooth Pursuit – Horizontal 0.1Hz: Percentiles |      |               |               |               |                        |
|------------------------------------------------------|------|---------------|---------------|---------------|------------------------|
|                                                      |      | Velocity gain | Asymmetry (%) | Position gain | Saccadic component (%) |
| Percentiles                                          | 2.5  | 0.78          | -8.87         | 0.96          | 3.04                   |
|                                                      | 5    | 0.82          | -8.07         | 0.96          | 4.04                   |
|                                                      | 10   | 0.85          | -6.55         | 0.98          | 5.94                   |
|                                                      | 25   | 0.91          | -3.13         | 0.99          | 9.85                   |
|                                                      | 75   | 1.01          | 2.04          | 1.02          | 22.22                  |
|                                                      | 90   | 1.04          | 5.22          | 1.03          | 29.12                  |
|                                                      | 95   | 1.05          | 6.89          | 1.03          | 33.33                  |
|                                                      | 97.5 | 1.07          | 7.59          | 1.04          | 35.40                  |
| Test: Smooth Pursuit – Horizontal 0.75Hz             |      |               |               |               |                        |
|                                                      |      | Velocity gain | Asymmetry (%) | Position gain | Saccadic component (%) |
| Percentiles                                          | 2.5  | 0.62          | -9.51         | 0.79          | 2.30                   |
|                                                      | 5    | 0.75          | -5.19         | 0.83          | 2.94                   |
|                                                      | 10   | 0.83          | -3.37         | 0.88          | 4.73                   |
|                                                      | 25   | 0.92          | -1.48         | 0.94          | 8.07                   |
|                                                      | 75   | 1.02          | 1.77          | 1.02          | 20.57                  |
|                                                      | 90   | 1.05          | 4.40          | 1.07          | 30.09                  |
|                                                      | 95   | 1.08          | 6.72          | 1.09          | 33.16                  |
|                                                      | 97.5 | 1.08          | 9.15          | 1.10          | 36.59                  |
| Test: Smooth Pursuit – Vertical 0.1Hz                |      |               |               |               |                        |

|             |      | Velocity gain | Asymmetry (%) | Position gain | Saccadic component (%) |
|-------------|------|---------------|---------------|---------------|------------------------|
| Percentiles | 2.5  | 0.69          | -12.67        | 0.95          | 2.39                   |
|             | 5    | 0.72          | -11.35        | 0.96          | 3.88                   |
|             | 10   | 0.77          | -9.33         | 0.96          | 5.56                   |
|             | 25   | 0.84          | -5.83         | 0.96          | 8.16                   |
|             | 75   | 0.97          | 3.38          | 1.02          | 18.56                  |
|             | 90   | 1.02          | 7.60          | 1.04          | 25.02                  |
|             | 95   | 1.05          | 9.41          | 1.05          | 27.84                  |
|             | 97.5 | 1.07          | 11.51         | 1.06          | 31.24                  |

Test: Smooth Pursuit – Vertical 0.75Hz

|             |      | Velocity gain | Asymmetry (%) | Position gain | Saccadic component (%) |
|-------------|------|---------------|---------------|---------------|------------------------|
| Percentiles | 2.5  | 0.41          | -23.60        | 0.73          | 3.89                   |
|             | 5    | 0.45          | -20.13        | 0.76          | 7.04                   |
|             | 10   | 0.56          | -11.68        | 0.80          | 9.99                   |
|             | 25   | 0.71          | -3.46         | 0.86          | 16.66                  |
|             | 75   | 0.95          | 10.20         | 1.01          | 36.97                  |
|             | 90   | 1.02          | 20.01         | 1.06          | 45.26                  |
|             | 95   | 1.06          | 24.90         | 1.09          | 48.96                  |
|             | 97.5 | 1.09          | 29.07         | 1.11          | 51.87                  |
