# Supplementary material for: Portable eye-tracking as a reliable assessment of oculomotor, cognitive and reaction time function: Normative data for 18–45 year old
Source: PubMed Central journal article supplement (PMC8608311; doi:10.1371/journal.pone.0260351), 2021-11-22
Supplement: pone.0260351.s003.pdf [file pone.0260351.s003.pdf]

**S3 Table. Percentiles for predictive saccades and antisaccades.** Data represent the 2.5, 5, 10, 25, 75, 90, 95 and 97.5 percentile for each metric.

| Test: Predictive Saccade |      |                          |                                |                                |
|--------------------------|------|--------------------------|--------------------------------|--------------------------------|
|                          |      | Percentage predicted (%) | 18-21 Percentage predicted (%) | 22-45 Percentage predicted (%) |
| Percentiles              | 2.5  | 16.67                    | 15.91                          | 17.39                          |
|                          | 5    | 24.11                    | 16.67                          | 26.09                          |
|                          | 10   | 29.50                    | 25.00                          | 34.78                          |
|                          | 25   | 45.99                    | 36.36                          | 52.17                          |
|                          | 75   | 78.26                    | 73.32                          | 82.61                          |
|                          | 90   | 86.96                    | 82.61                          | 91.30                          |
|                          | 95   | 91.30                    | 86.96                          | 95.45                          |
|                          | 97.5 | 95.62                    | 90.12                          | 95.65                          |
| Test: Antisaccades       |      |                          |                                |                                |
|                          |      | Error rate (%)           |                                |                                |
| Percentiles              | 2.5  | 0                        |                                |                                |
|                          | 5    | 0                        |                                |                                |
|                          | 10   | 0                        |                                |                                |
|                          | 25   | 6.25                     |                                |                                |
|                          | 75   | 25                       |                                |                                |
|                          | 90   | 37.5                     |                                |                                |
|                          | 95   | 46.6                     |                                |                                |

|  |      |    |
|--|------|----|
|  | 97.5 | 50 |
|--|------|----|
