# Supplementary material for: Portable eye-tracking as a reliable assessment of oculomotor, cognitive and reaction time function: Normative data for 18–45 year old
Source: PubMed Central journal article supplement (PMC8608311; doi:10.1371/journal.pone.0260351), 2021-11-22
Supplement: pone.0260351.s004.pdf [file pone.0260351.s004.pdf]

**S4 Table. Percentiles for reaction time tests.** Data represent the 2.5, 5, 10, 25, 75, 90, 95 and 97.5 percentile for each metric.

| Test: Visual Reaction Time   |      |                                                    |                          |                     |
|------------------------------|------|----------------------------------------------------|--------------------------|---------------------|
|                              |      | Latency (ms)                                       |                          |                     |
| Percentiles                  | 2.5  | 220.12                                             |                          |                     |
|                              | 5    | 228.58                                             |                          |                     |
|                              | 10   | 235.00                                             |                          |                     |
|                              | 25   | 247.08                                             |                          |                     |
|                              | 75   | 287.50                                             |                          |                     |
|                              | 90   | 311.80                                             |                          |                     |
|                              | 95   | 332.55                                             |                          |                     |
|                              | 97.5 | 342.50                                             |                          |                     |
| Test: Auditory Reaction Time |      |                                                    |                          |                     |
|                              |      | Latency (ms)<br>(combined male and<br>female data) | Female - Latency<br>(ms) | Male - Latency (ms) |
| Percentiles                  | 2.5  | 163.33                                             | 161.10                   | 161.33              |
|                              | 5    | 168.81                                             | 176.94                   | 167.78              |
|                              | 7.5  | 174.65                                             | 186.90                   | 172.15              |
|                              | 10   | 178.89                                             | 192.14                   | 175.00              |
|                              | 25   | 195.56                                             | 206.67                   | 192.14              |
|                              | 75   | 247.84                                             | 265.00                   | 238.33              |

|                                        |      |                                               |                                            |                           |
|----------------------------------------|------|-----------------------------------------------|--------------------------------------------|---------------------------|
|                                        | 90   | 281.11                                        | 300.00                                     | 268.67                    |
|                                        | 95   | 304.16                                        | 321.07                                     | 295.00                    |
|                                        | 97.5 | 317.71                                        | 336.13                                     | 305.34                    |
| <b>Test: Saccade and Reaction Time</b> |      |                                               |                                            |                           |
| <b>Saccade variables:</b>              |      | <b>Latency (s)</b>                            | <b>Accuracy (%)</b>                        | <b>Final accuracy (%)</b> |
| Percentiles                            | 2.5  | 0.14                                          | 73.64                                      | 78.41                     |
|                                        | 5    | 0.15                                          | 76.60                                      | 83.38                     |
|                                        | 10   | 0.16                                          | 81.01                                      | 86.83                     |
|                                        | 25   | 0.17                                          | 84.93                                      | 91.10                     |
|                                        | 75   | 0.21                                          | 92.87                                      | 97.03                     |
|                                        | 90   | 0.24                                          | 95.71                                      | 99.57                     |
|                                        | 95   | 0.27                                          | 98.26                                      | 101.98                    |
|                                        | 97.5 | 0.29                                          | 100.78                                     | 105.86                    |
| <b>Motor variables</b>                 |      | <b>Latency mean (s) – for<br/>Left Button</b> | <b>Latency mean (s) – for Right Button</b> |                           |
| Percentiles                            | 2.5  | 0.25                                          | 0.24                                       |                           |
|                                        | 5    | 0.26                                          | 0.26                                       |                           |
|                                        | 10   | 0.29                                          | 0.28                                       |                           |
|                                        | 25   | 0.35                                          | 0.34                                       |                           |
|                                        | 75   | 0.48                                          | 0.46                                       |                           |
|                                        | 90   | 0.57                                          | 0.54                                       |                           |
|                                        | 95   | 0.62                                          | 0.58                                       |                           |

|  |      |      |      |
|--|------|------|------|
|  | 97.5 | 0.66 | 0.65 |
|--|------|------|------|
