# Supplementary material for: Portable eye-tracking as a reliable assessment of oculomotor, cognitive and reaction time function: Normative data for 18–45 year old
Source: PubMed Central journal article supplement (PMC8608311; doi:10.1371/journal.pone.0260351), 2021-11-22
Supplement: pone.0260351.s005.pdf [file pone.0260351.s005.pdf]

**S5 Table. Descriptive statistics.** Mean and standard deviation (SD) for each test metric.

| <b>Test</b>                            | <b>Metrics</b>            | <b>Mean</b> | <b>SD</b> |
|----------------------------------------|---------------------------|-------------|-----------|
| Saccade –<br>Random,<br>Horizontal     | Latency (s)               | 0.17        | 0.02      |
|                                        | Accuracy (%)              | 92.11       | 5.12      |
|                                        | Final accuracy (%)        | 96.27       | 4.23      |
|                                        | AUF (deg <sup>2</sup> /s) | 10397       | 999       |
| Saccade –<br>Random,<br>Vertical       | Latency (s)               | 0.18        | 0.02      |
|                                        | Accuracy (%)              | 92.59       | 8.93      |
|                                        | Final accuracy (%)        | 94.45       | 7.11      |
|                                        | AUF (deg <sup>2</sup> /s) | 9887        | 1197      |
| Smooth Pursuit –<br>Horizontal 0.1Hz   | Velocity gain             | 0.95        | 0.07      |
|                                        | Asymmetry (%)             | -0.53       | 4.24      |
|                                        | Position gain             | 1.00        | 0.02      |
|                                        | Saccadic component (%)    | 16.51       | 8.57      |
| Smooth Pursuit – Horizontal<br>0.75 Hz | Velocity gain             | 0.95        | 0.10      |
|                                        | Asymmetry (%)             | 0.12        | 3.98      |
|                                        | Position gain             | 0.98        | 0.07      |
|                                        | Saccadic component (%)    | 14.90       | 9.30      |
| Smooth Pursuit – Vertical<br>0.1 Hz    | Velocity gain             | 0.90        | 0.10      |
|                                        | Asymmetry (%)             | -1.11       | 6.36      |
|                                        | Position gain             | 1.00        | 0.03      |
|                                        | Saccadic component (%)    | 13.97       | 7.44      |

|                                      |                          |       |       |
|--------------------------------------|--------------------------|-------|-------|
| Smooth Pursuit – Vertical<br>0.75 Hz | Velocity gain            | 0.82  | 0.17  |
|                                      | Asymmetry (%)            | 3.11  | 12.49 |
|                                      | Position gain            | 0.94  | 0.10  |
|                                      | Saccadic component (%)   | 27.07 | 13.07 |
| Predictive Saccades                  | Percentage predicted (%) | 61.84 | 21.84 |
| Antisaccades                         | Error rate (%)           | 17.97 | 13.78 |
| Visual Reaction Time                 | Latency (ms)             | 270.2 | 30.1  |
| Auditory Reaction Time               | Latency (ms)             | 224.3 | 39.7  |
| Saccade and Reaction Time            | Latency (s)              | 0.20  | 0.04  |
